# Supplementary material
Source: PubMed Central journal article supplement (PMC3631442)

# **Peptide ligands for pro-survival protein Bfl-1 from computationally guided library screening**

Sanjib Dutta, T. Scott Chen and Amy E. Keating\*

Department of Biology, Massachusetts Institute of Technology, Cambridge, 02139

**(Supporting Information)**

**Supplemental Table 1.** Half lives for dissociation of fluoresceinated peptides from different pro-survival proteins.

| Fluoresceinated peptides | Half life (minutes) |       |                    |       |       |
|--------------------------|---------------------|-------|--------------------|-------|-------|
|                          | Bfl-1               | Mcl-1 | Bcl-x <sub>L</sub> | Bcl-2 | Bcl-w |
| Bim (18-mer)             | 40                  | 14    | 2                  | 14    | <1    |
| Bim (23-mer)             | > 2000              | >2000 |                    | 55    |       |
| FA1 (23-mer)             | > 2000              | 243   |                    | <1    |       |
| FA1_D3fK (23-mer)        | 5                   |       |                    |       |       |
| Bim_D3fK (23-mer)        | <1                  | <1    |                    |       |       |
| Bim_D3fKF4aL (23-mer)    | 15                  | 3     |                    |       |       |
| Bim_D3fKE3gV (23-mer)    | <1                  | <1    |                    |       |       |
| Bim_I3dAD3fK (23-mer)    | <1                  |       |                    |       |       |
| FW1 (23-mer)             | 37                  | 197   |                    | 2     |       |

<sup>a</sup>Concentration of fluorescent peptide was 10-20 nM in all experiments.

<sup>b</sup>Concentration of pro-survival protein ranged from 50-100 nM.

**Supplemental Table 2.** Sequences of BH3 peptides selected for binding to Bfl-1 preferentially over Bcl-w.

| BH3 peptide | Sequence <sup>a</sup>        |   |   |
|-------------|------------------------------|---|---|
|             | 2                            | 3 | 4 |
|             | defgabcdefga                 |   |   |
| FW1         | IAQ <b>GLRRIGD</b> <b>TW</b> |   |   |
| FW2         | <b>LAQGLRRVGD</b> <b>KW</b>  |   |   |
| FW3         | IAQELRRIGD <b>KI</b>         |   |   |
| FW4         | IAQ <b>CLRRVGD</b> <b>KW</b> |   |   |
| FW5         | IAQELRRIGDE <b>W</b>         |   |   |
| FW6         | IAQELRRIGD <b>KF</b>         |   |   |

**Supplemental Figure 1.** Analysis of the population selected after 4 rounds of positive screening for binding to 1  $\mu$ M Bfl-1. Shown are FACS dot plots for binding to (A) 100 nM Bfl-1 (B) only antibodies and (C) 100 nM Bfl-1 in the presence of 1  $\mu$ M unlabeled Bim BH3 peptide.

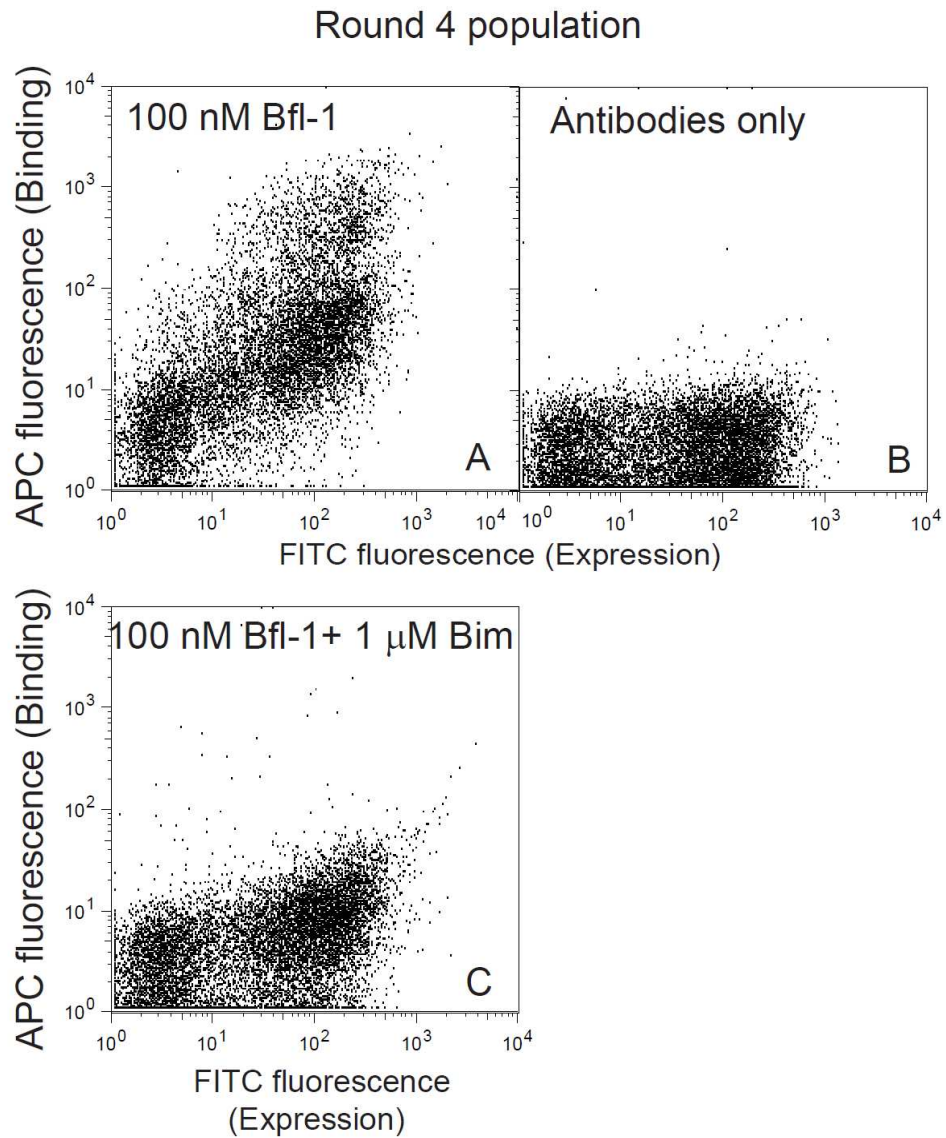

**Supplemental Figure 2.** Fluorescence polarization competition assay for Bim and FD3 binding to Bfl-1. The concentrations of fluorescent Bim and the prosurvival proteins were 10 nM and 50 nM, respectively. The sequences of Bim and FD3, with heptad numbering, are shown at the top.

----2-----3-----4----  
 abcdefgabcdefgabcdefg  
 Bim RPEIWIAQELRRIGDEFNAYYAR  
 FD3 RPEIWLYQVLRRYGDLWNAYYAR

### Binding to Bfl-1

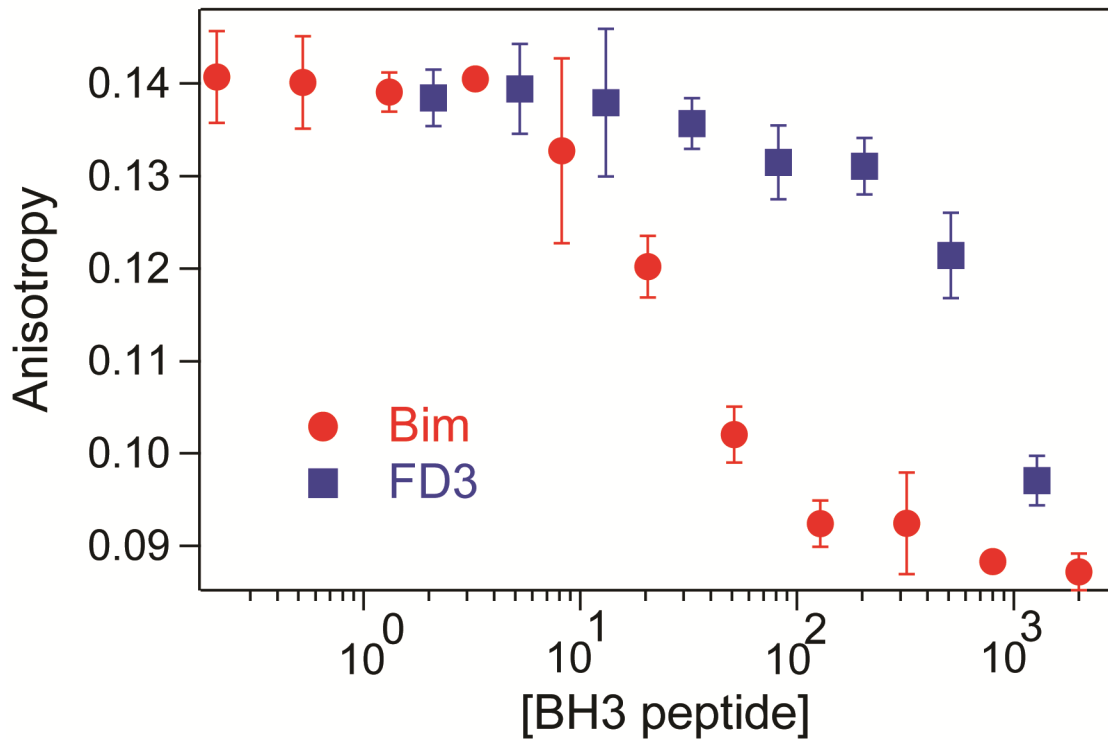

**Supplemental Figure 3.** Sequence logo generated from 74 unique sequences obtained from conventional sequencing of 96 clones from the yeast population after 4 rounds of positive selection against 1  $\mu$ M Bfl-1. The positions randomized in the library are shown at the bottom.

74 unique sequences from sequencing of 96 clones from  
Round 4 population

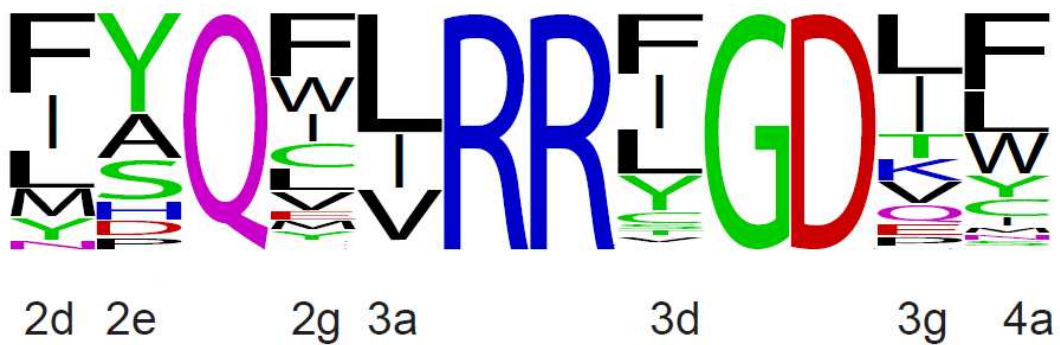

**Supplemental Figure 4.** Competition of designed unlabeled peptides with fluorescently labeled Bim BH3 for binding to Bfl-1 (a), Mcl-1 (b), Bcl-x<sub>L</sub> and (c) Bcl-w (d). The concentrations of fluorescent Bim and the prosurvival proteins were 10 nM and 50 nM, respectively. Measurements for panels were made after 20 hours. Note that Bim binding to Bfl-1 and Mcl-1, and FA1 binding to Bfl-1, were probably not yet equilibrated at this time point.

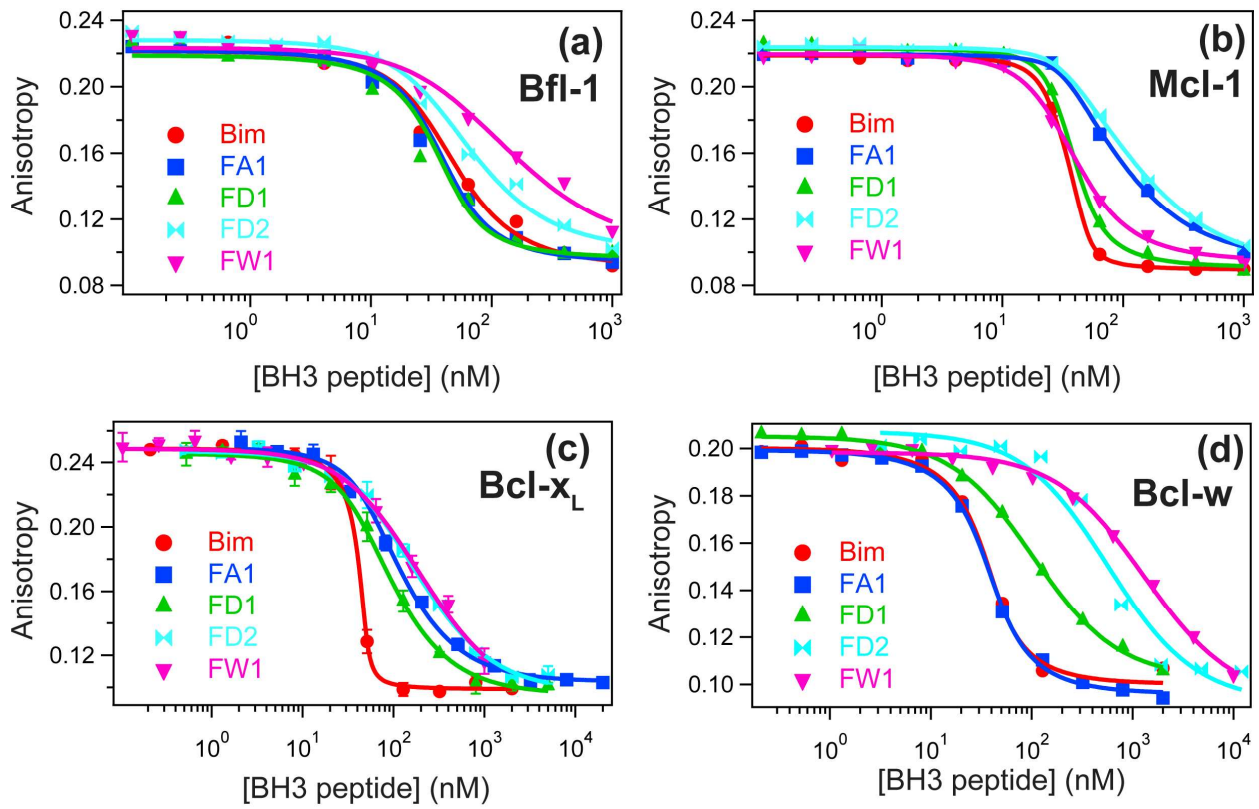

**Supplemental Figure 5.** The Bfl-1 binding population after 4 rounds of positive selection was assayed for binding to (A) 100 nM Mcl-1 (B) 100 nM Bcl-x<sub>L</sub> (C) 100 nM Bcl-w and (D) 100 nM Bcl-2.

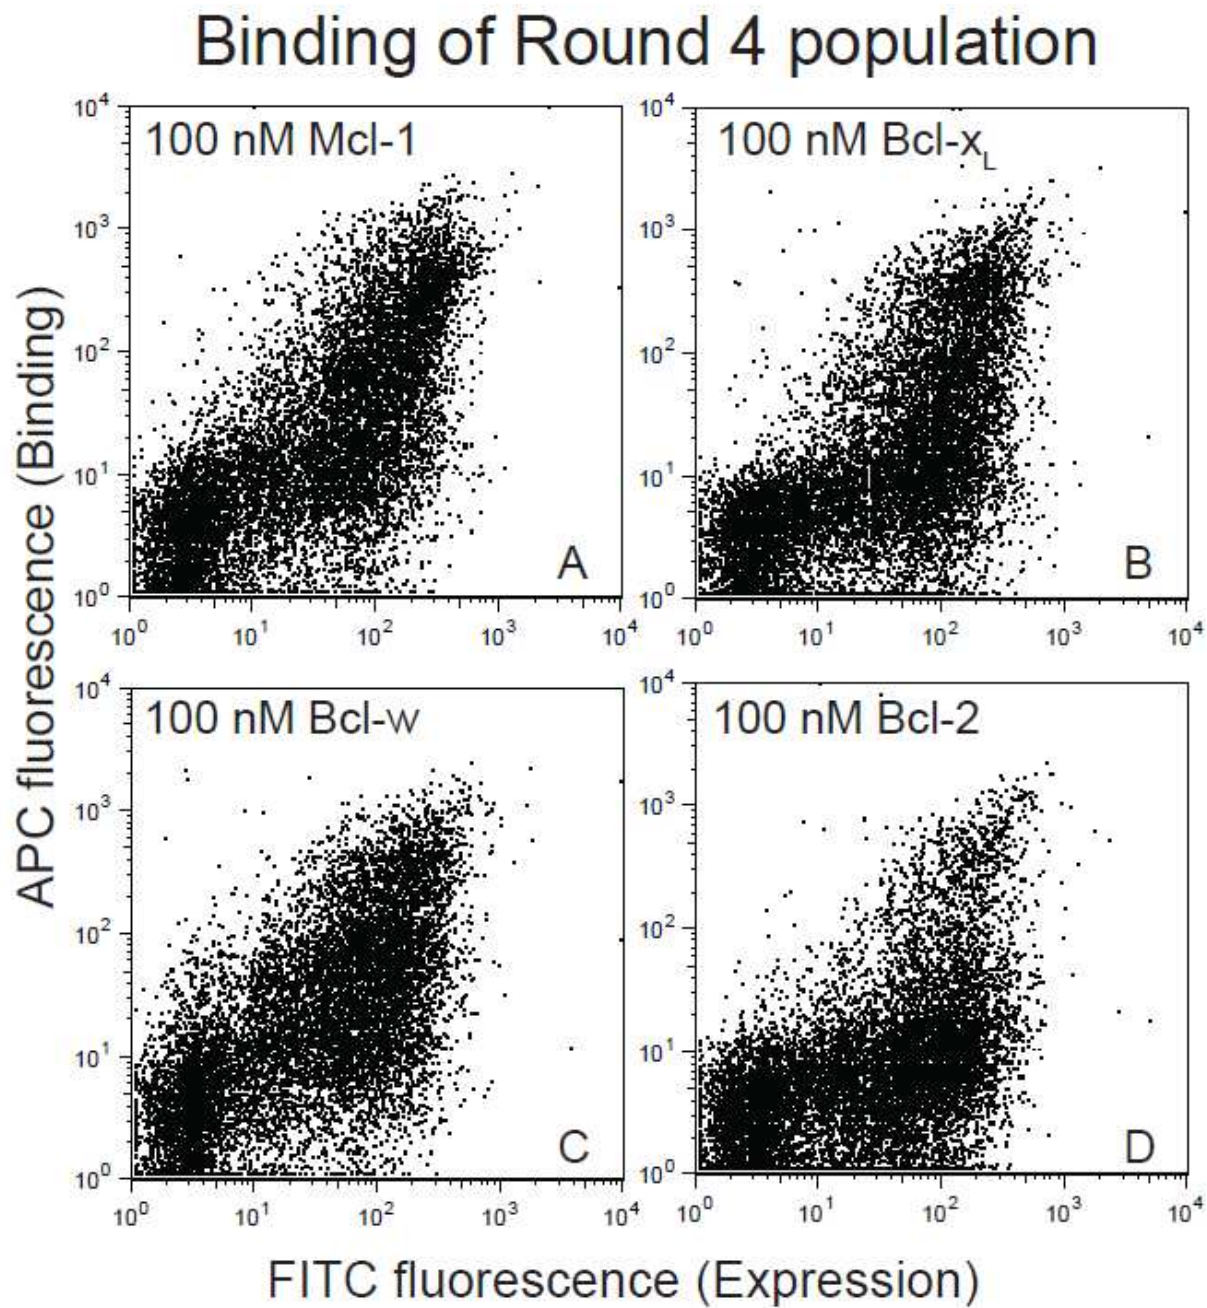



**Supplemental Figure 6.** Binding of yeast displaying FA1 to 10 nM Mcl-1 (A) or 10 nM Bcl-x<sub>L</sub> (B) monitored using FITC fluorescence (expression axis) and APC fluorescence (binding axis).

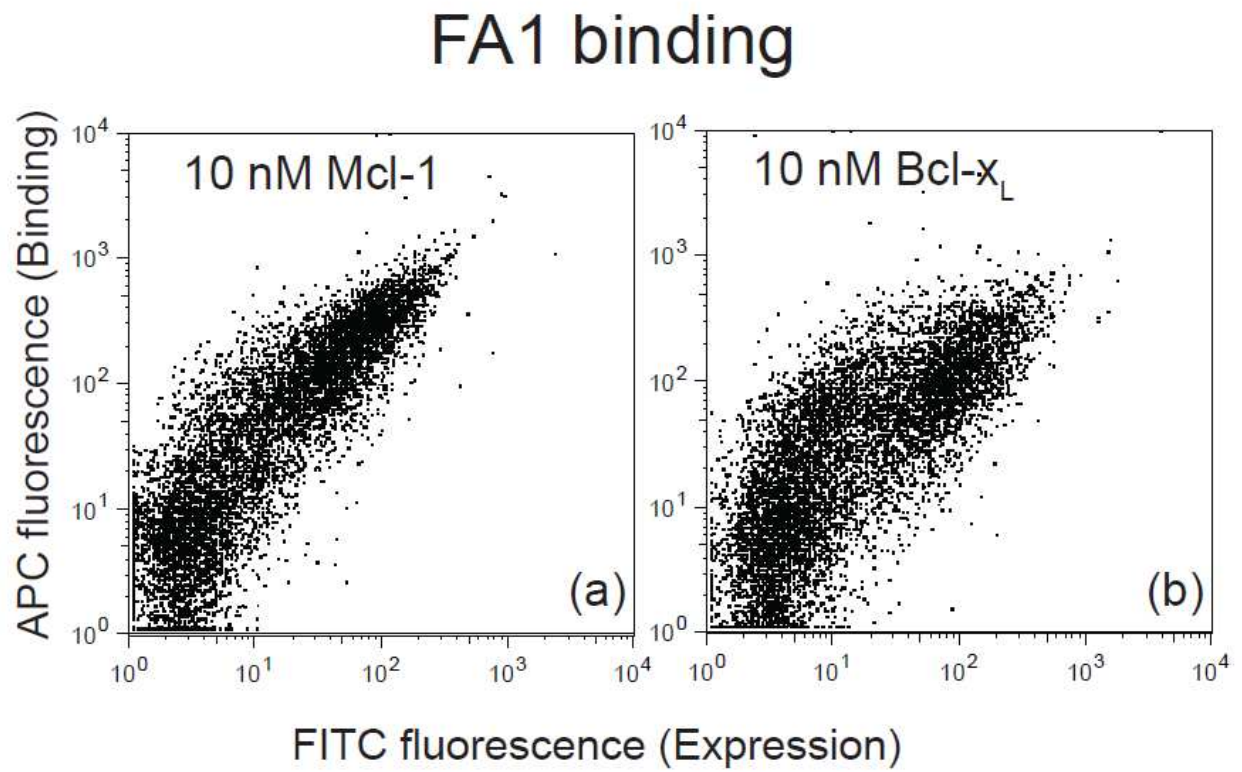

**Supplemental Figure 7.** Competition of unlabeled FA1\_D3fK with fluorescently labeled Bim BH3 for binding to Bfl-1, Mcl-1 and Bcl-x<sub>L</sub>.

### FA1\_D3fK fluorescence polarization competition assay for binding to pro-survival proteins

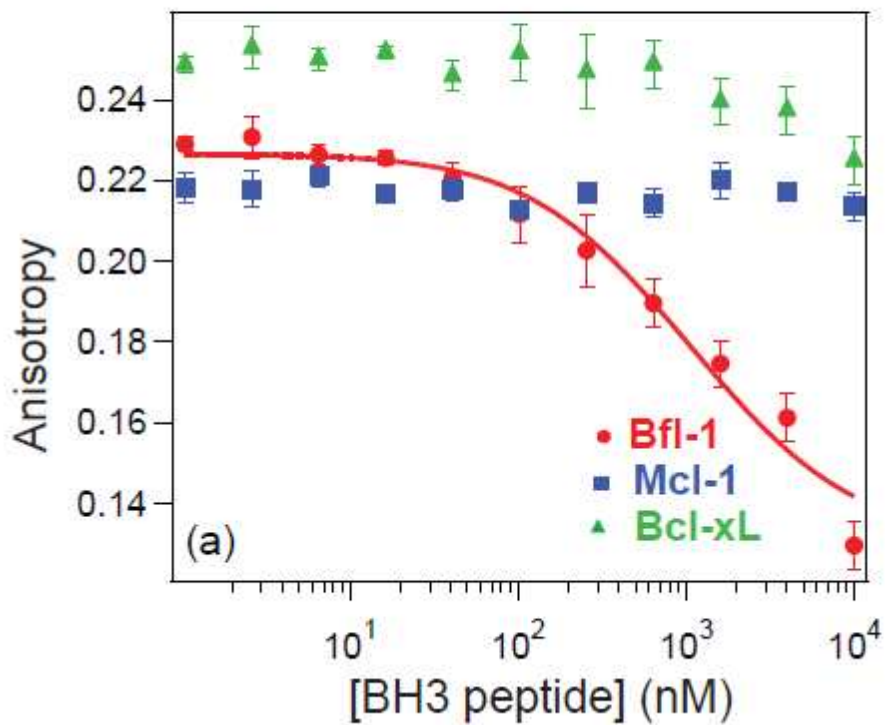

Supplement: NIHMS443232-supplement-1_si_001.pdf [file NIHMS443232-supplement-1_si_001.pdf]
